# Supplementary material for: Marine Sulfated Polysaccharides as Promising Antiviral Agents: A Comprehensive Report and Modeling Study Focusing on SARS CoV-2
Source: MDPI journal article supplement (doi:10.3390/md19080406), 2021-07-22
Supplement: s1 [file s1]

## Supplementary data

### Marine Sulfated Polysaccharides as Promising Antiviral Agents: A Comprehensive Review and Modelling Study Focussing on SARS CoV-2

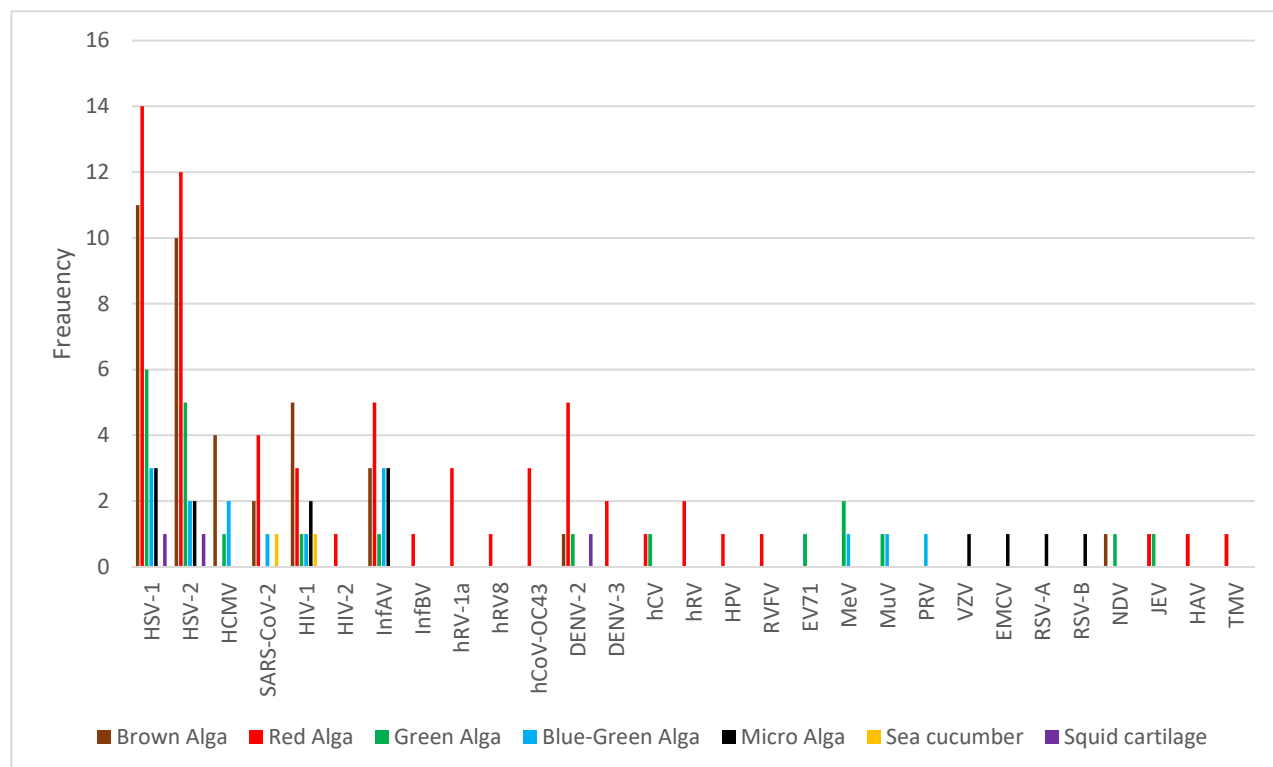

**Figure S1.** The frequent study of marine sources of MSPs that have shown antiviral activities against the mentioned virus strains during the last 25 years.

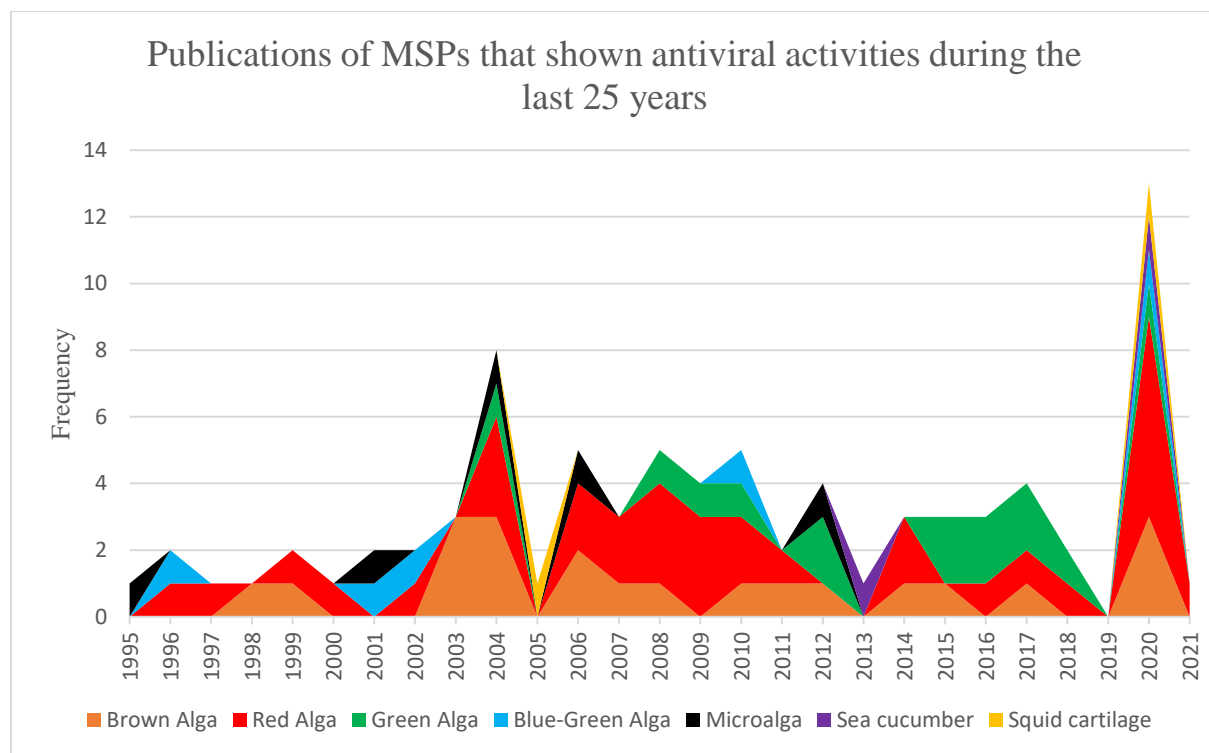

**Figure S2.** The publications number of MSPs that exhibit antiviral activities during the last 25 years.

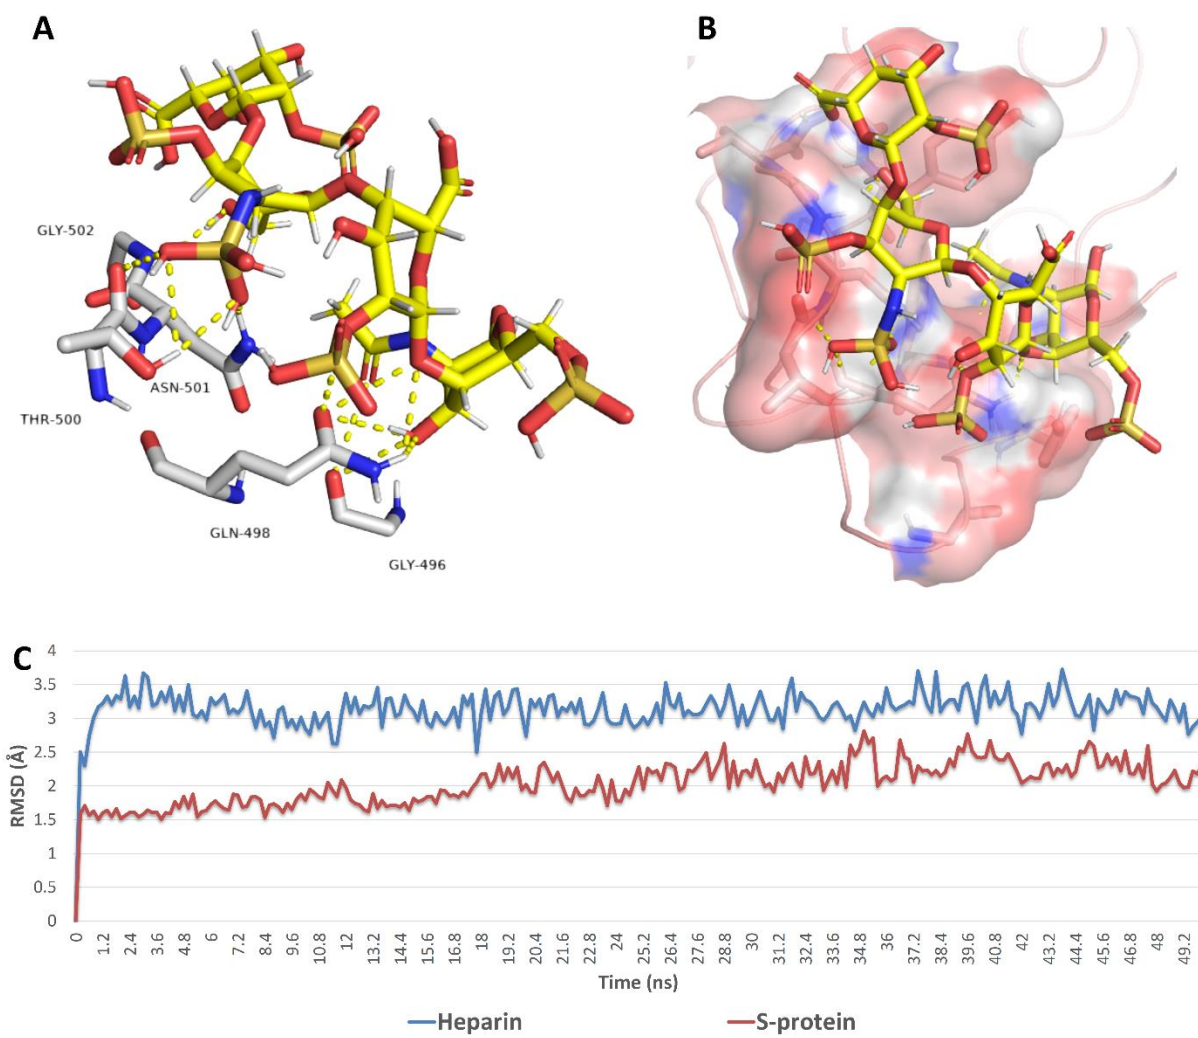

**Figure S3.** Binding mode of heparin with Site 1 (A and B) together with the RMSDs of heparin and RBD during 50 ns MDSs (C).

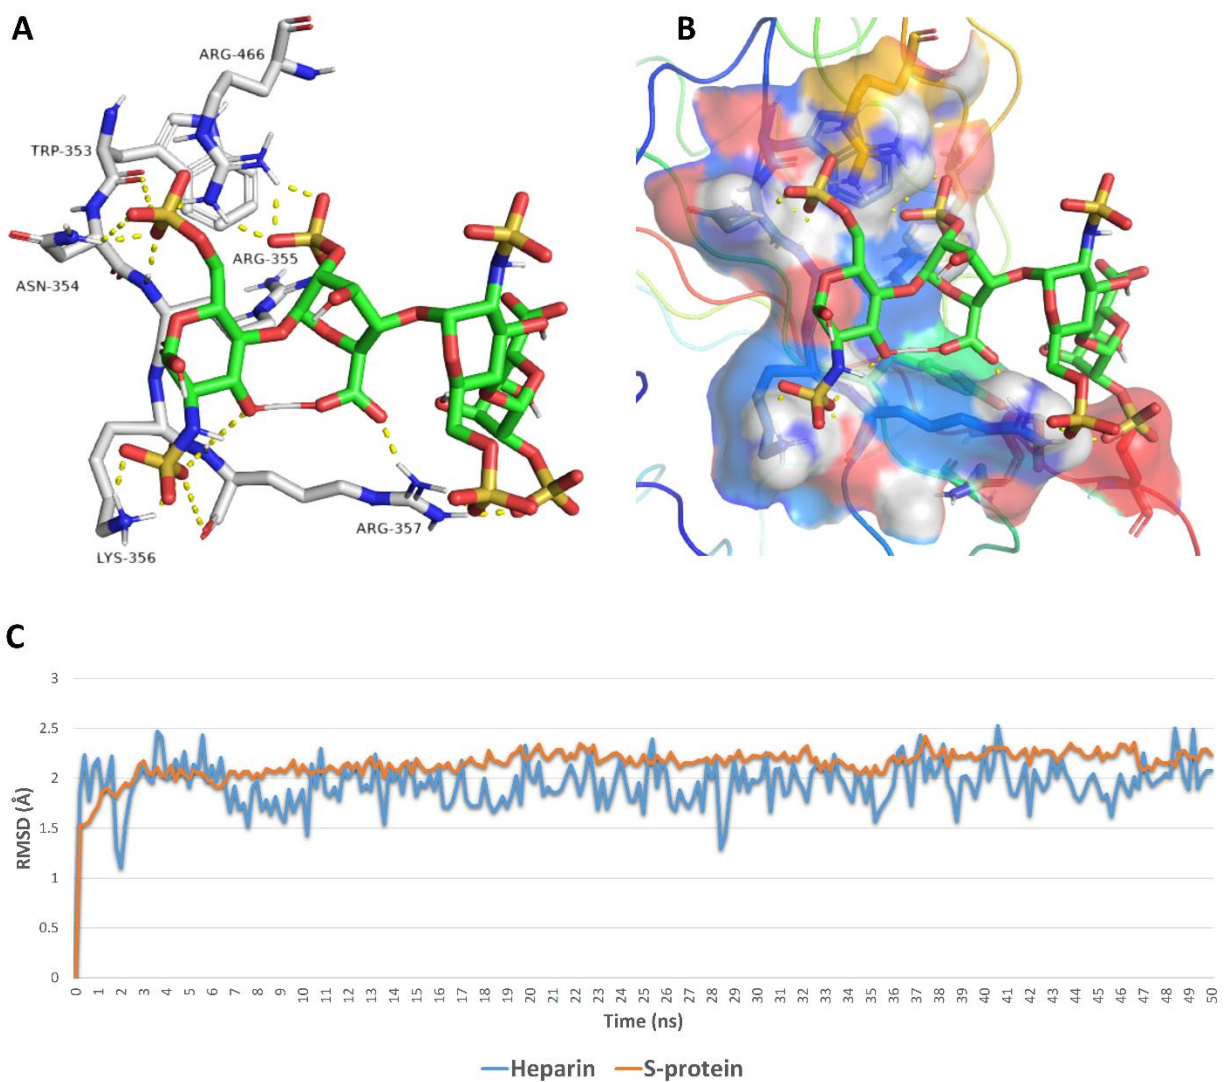

**Figure S4.** Binding mode of heparin with Site 2 (A and B) together with the RMSDs of heparin and RBD during 50 ns MDs (C).

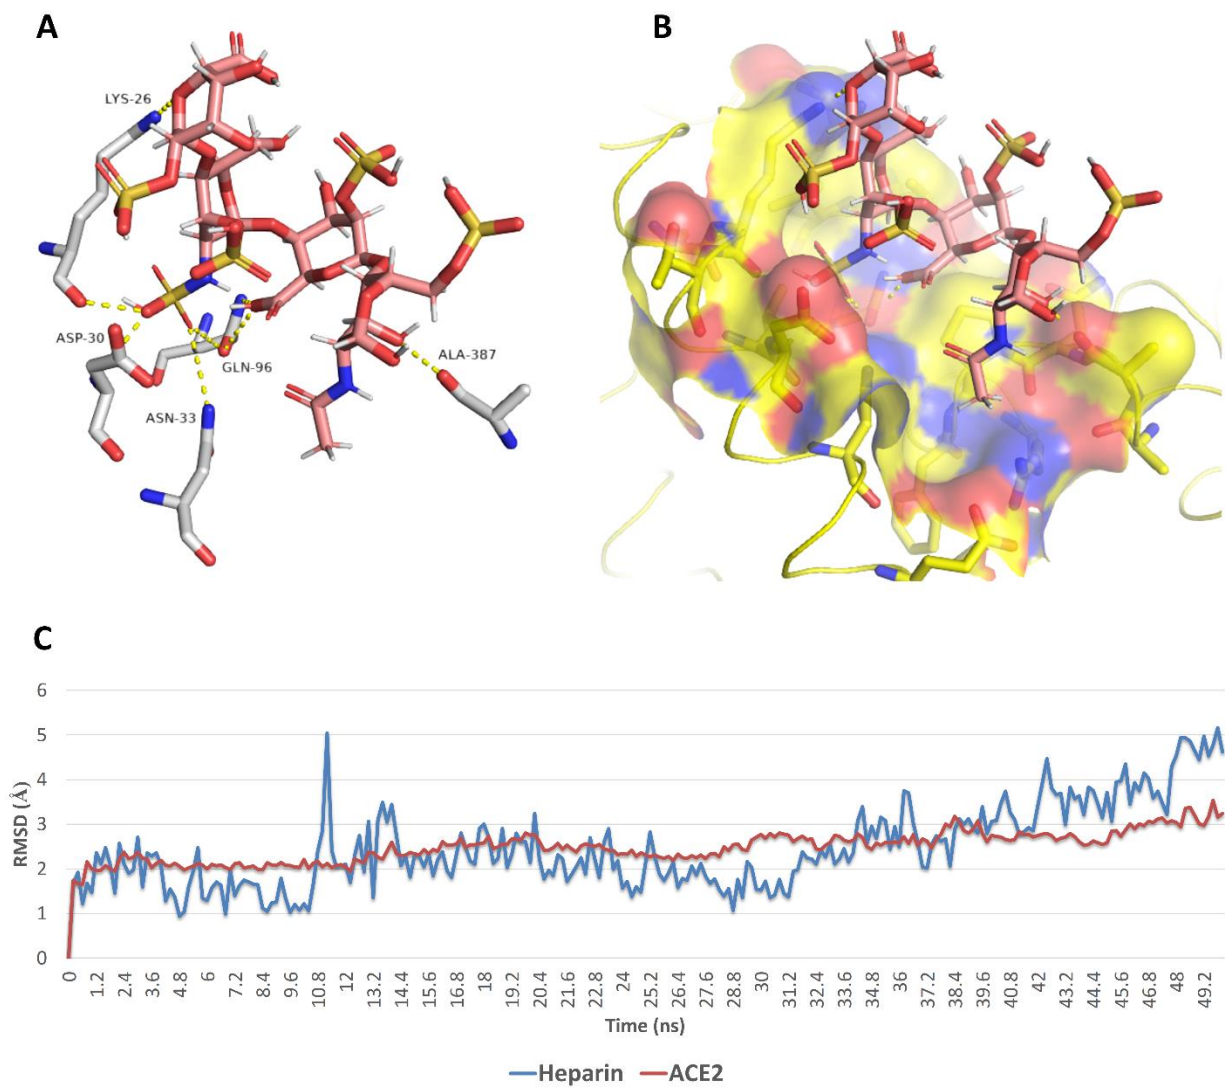

**Figure S5.** Binding mode of heparin with Site 3 (A and B) together with the RMSDs of heparin and RBD during 50 ns MDs (C).



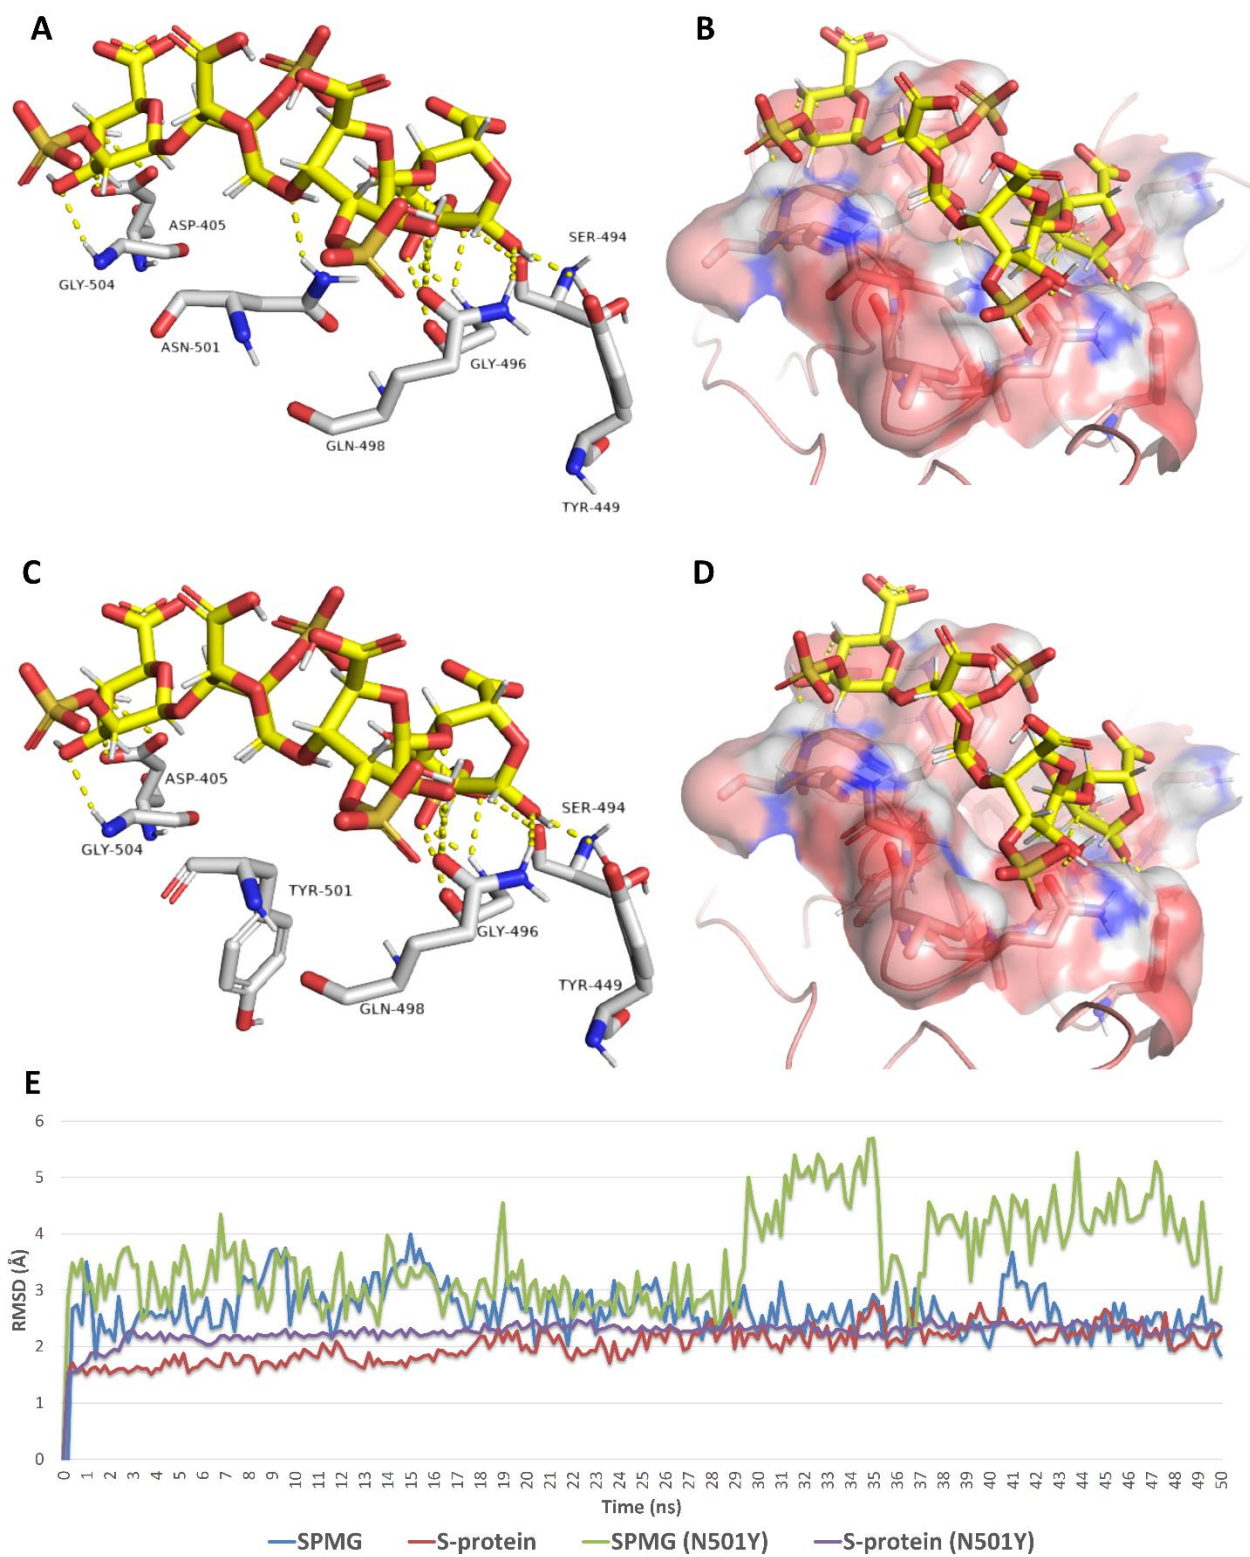

**Figure S6.** Binding mode of SPMG (compound 2) inside Site 1 (A and B) and its mutated form (C and D) together with its RMSDs during 50 ns of MDSS (E).

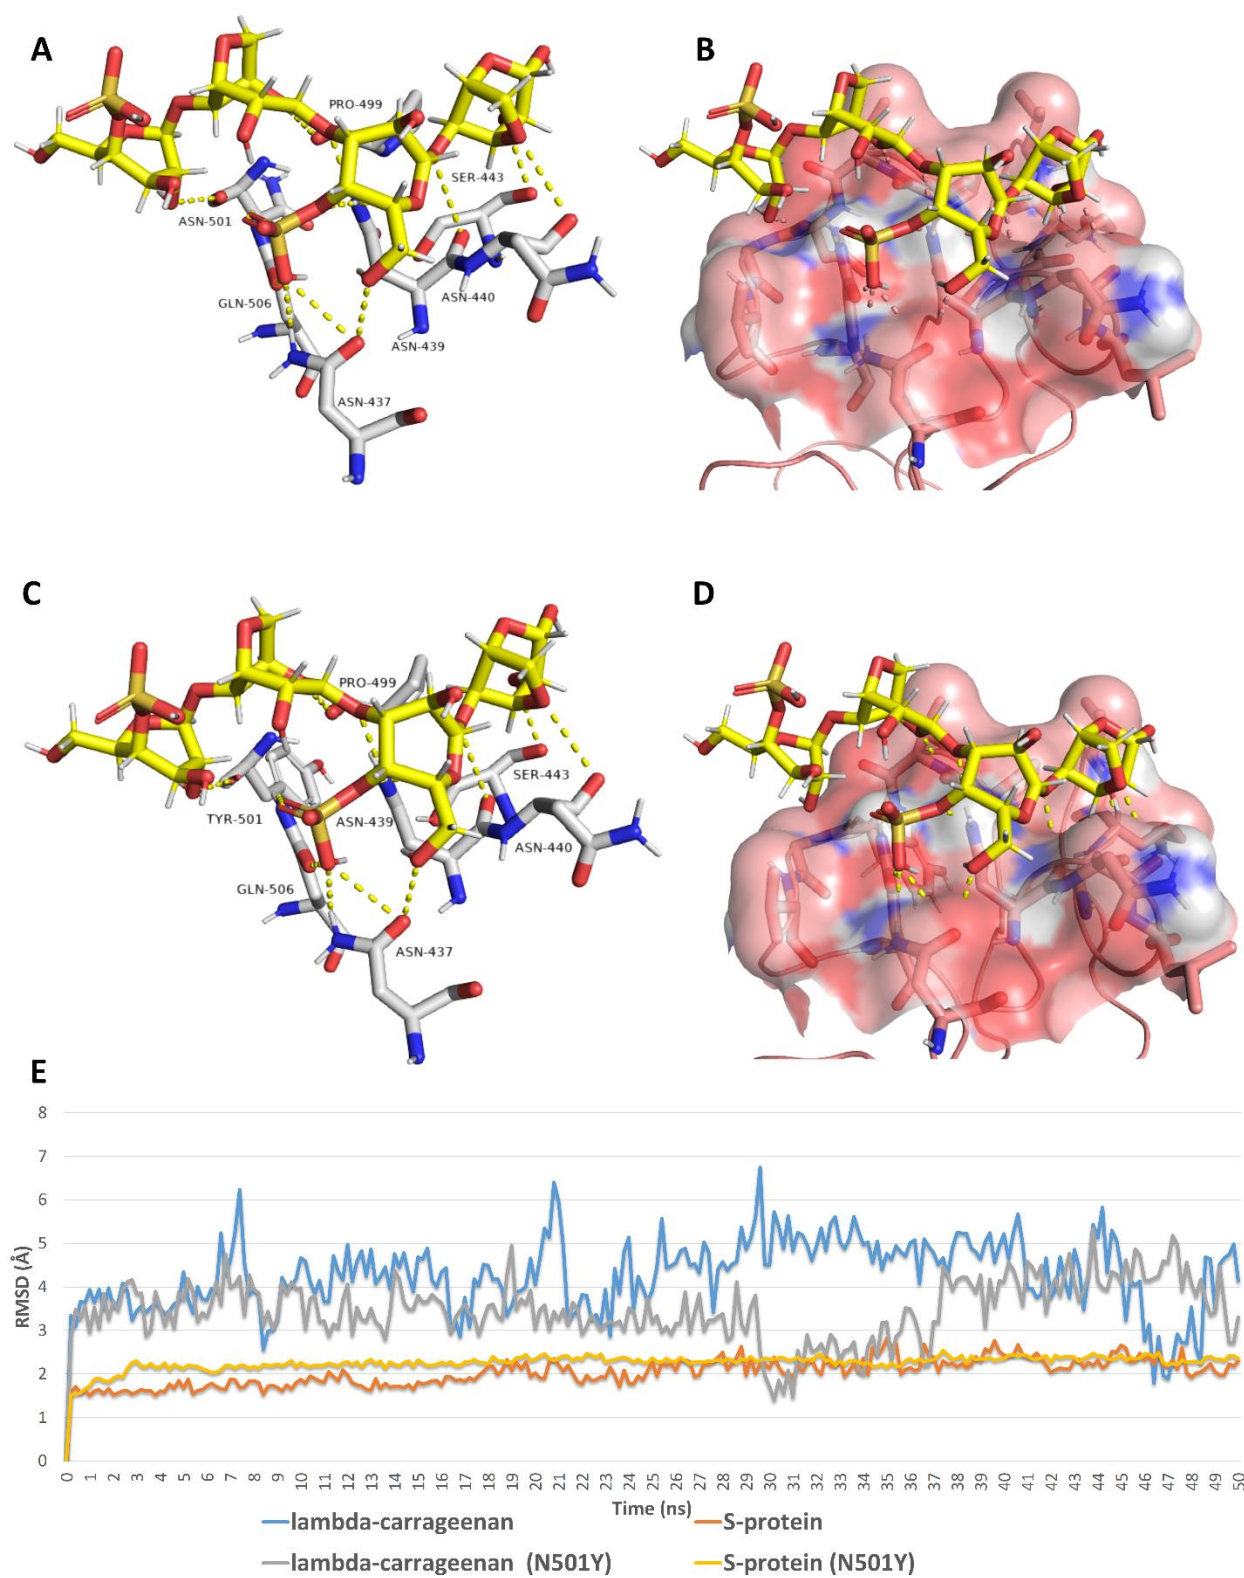

**Figure S7.** Binding mode of lambda-carrageenan (compound 5) inside Site 1 (A and B) and its mutated form (C and D) together with its RMSDs during 50 ns of MDs (E).

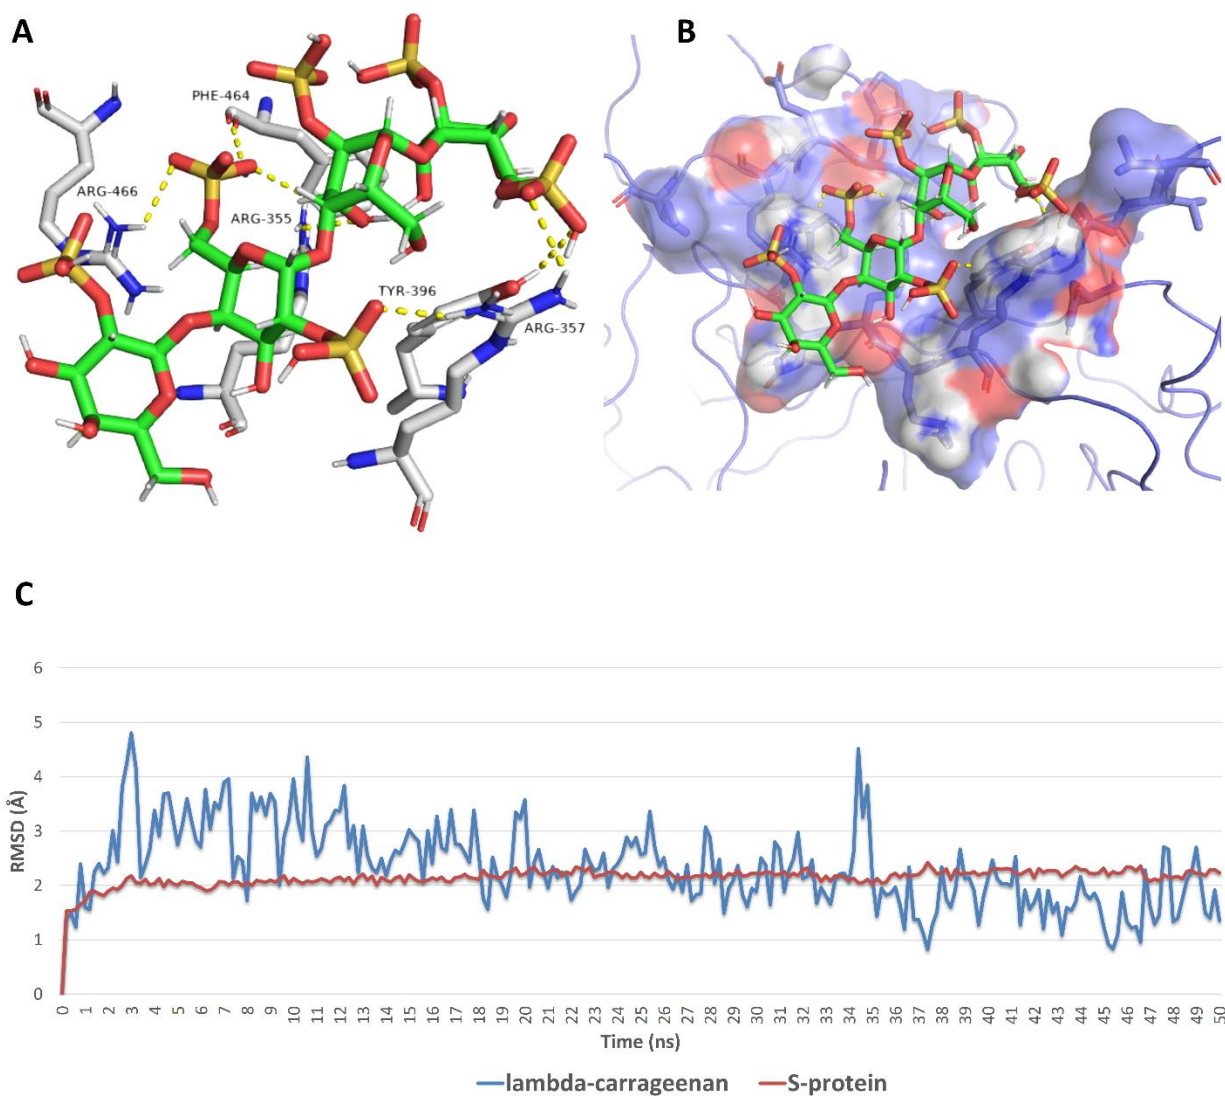

**Figure S8.** Binding mode of lambda-carrageenan (compound 5) inside Site 2 (A and B) together with its RMSDs during 50 ns of MDSs (C).



## Brown Algae

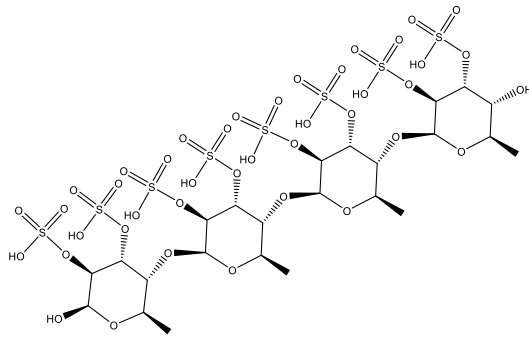

Fucoidan:  $\alpha$ -(1  $\rightarrow$  4)-linked  
glucopyranosyl residues

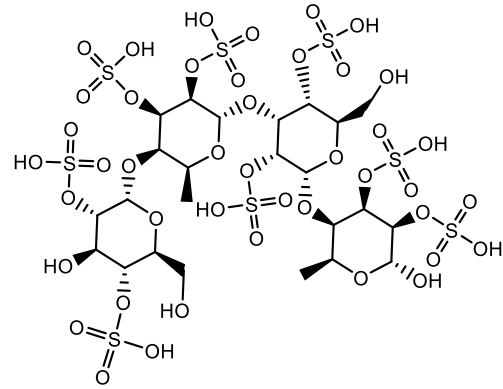

Sulfated galactofucan:  $\alpha$ -(1,3)-  
and (1,4)- $\alpha$ -L- (alternating)

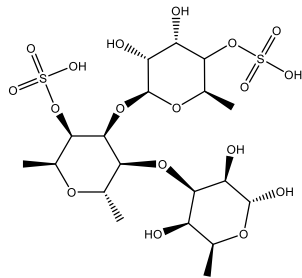

Sulfated Fucans

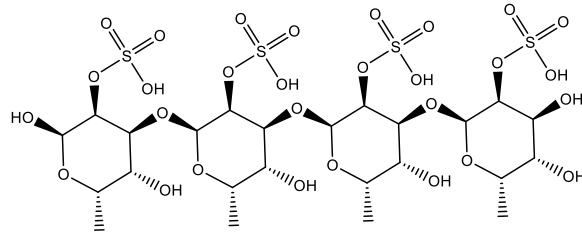

Fucoidan:  $\alpha$ -(1 $\rightarrow$ 3)-linked

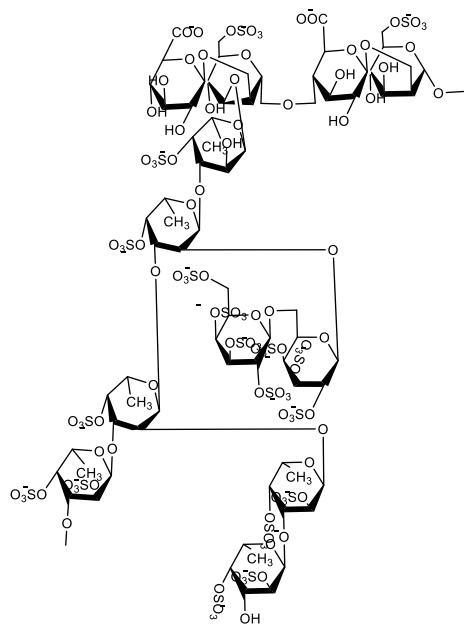

Fucoidan: RPI-27 and RPI-28 in a complex

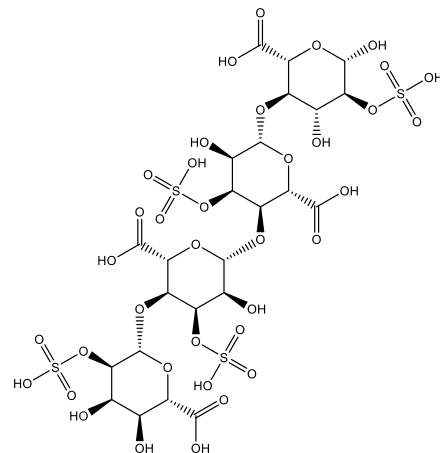

Sulfated polymannuroguluronate (SPMG)

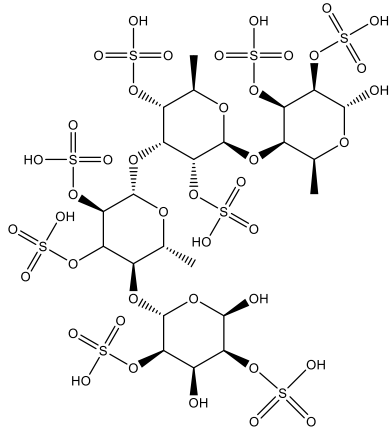

Sulfated galactofucan

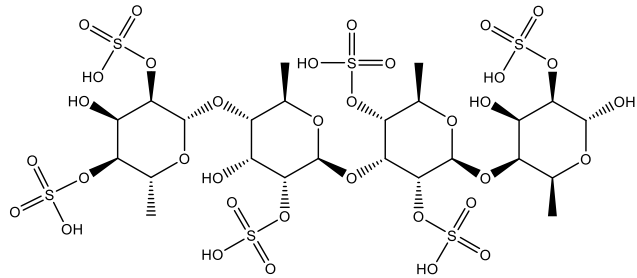

Sulfated fucan: (1→4)- and (1→3)-  
linked- $\alpha$ -l-fucopyranosyl residues

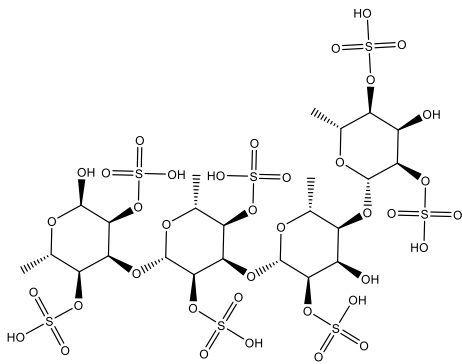

Fucoidan: (1,3)- $\alpha$ -l-fuc, (1,3)- and (1,4)- $\alpha$ -l-fuc

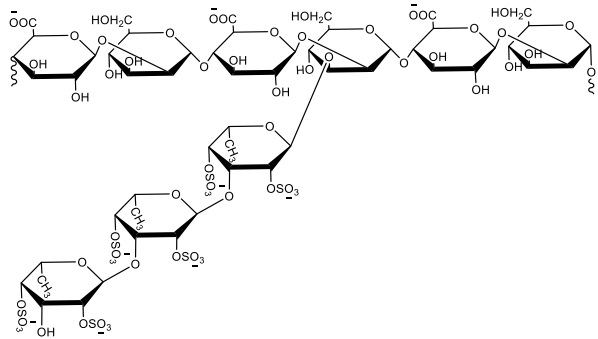

Fucoidan KW

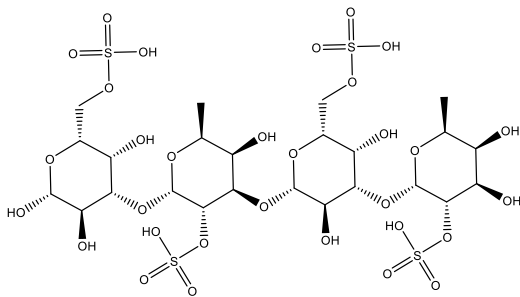

Galactofucan

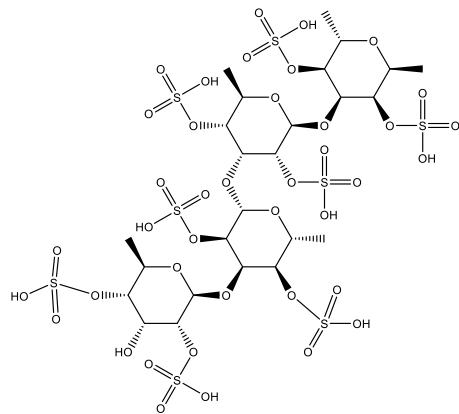

Fucoidan

## Red Algae

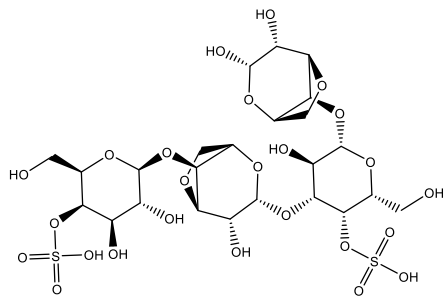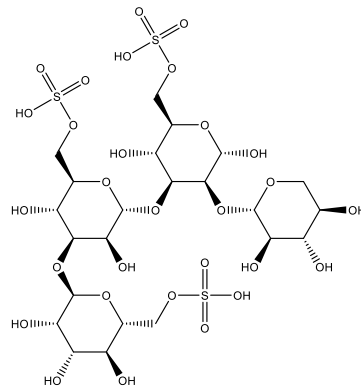

## Kappa-Carrageenan

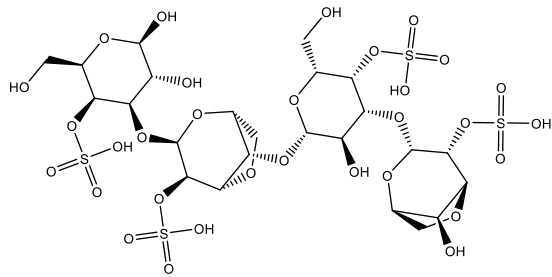

## Sulfated xylomannans

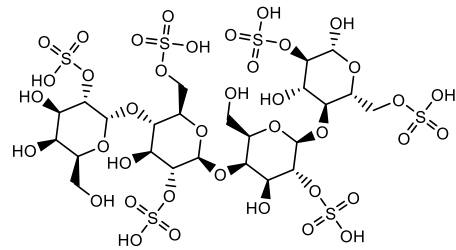

## Iota-carrageenan

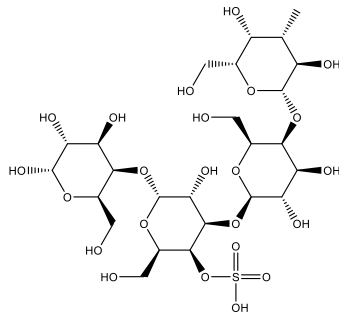

## lambda-carrageenan

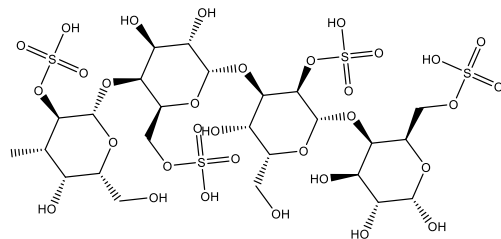

## DL-hybrid sulfated galactan

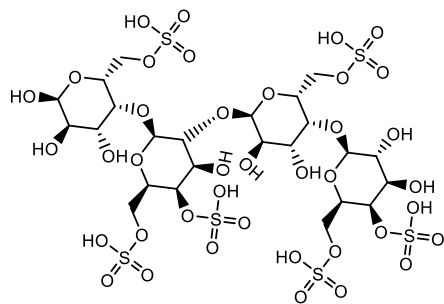

## DL-galactan hybrid C2S-3

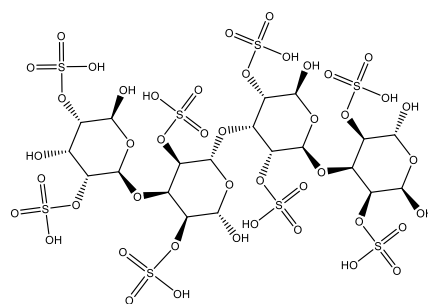

## Sulfated galactan

## Sulfated mannan

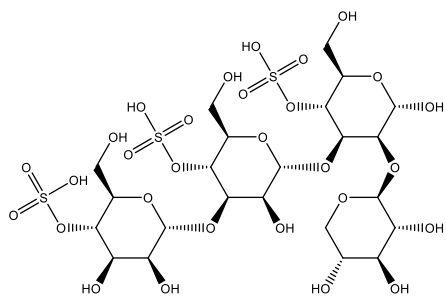

Sulfated xylomannan

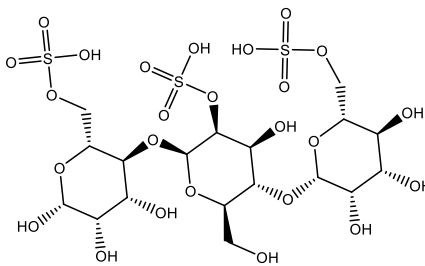

Sulfated xylomannans:  $\alpha$ -(1→3)-linked  
D-mannopyranosyl residues

## Green Algae

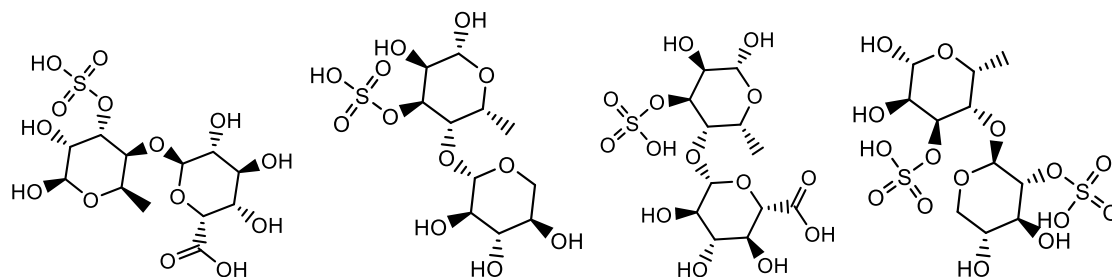

Ulvans

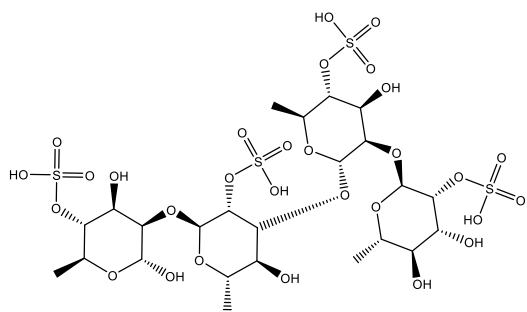

Sulfated heterorhamnan

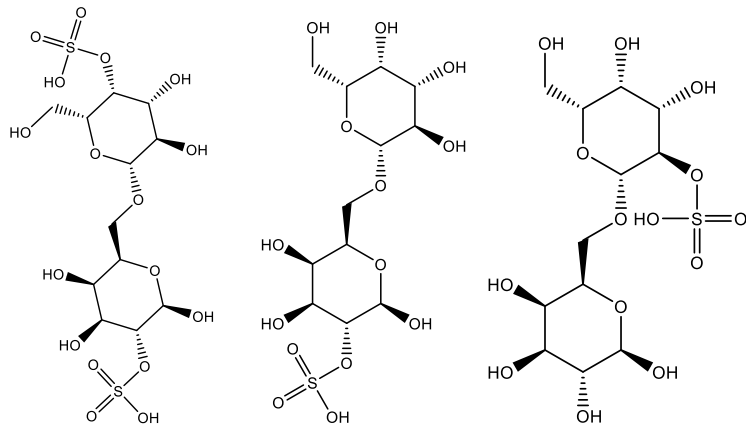

Sulfated arabinoxylogalactans

## Blue-Green Algae

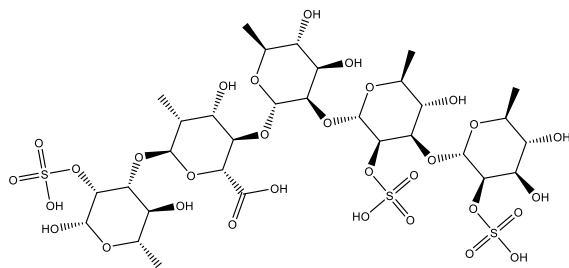

Spirulan (Ca-SP)

## Marine animal-derived sulfated polysaccharides

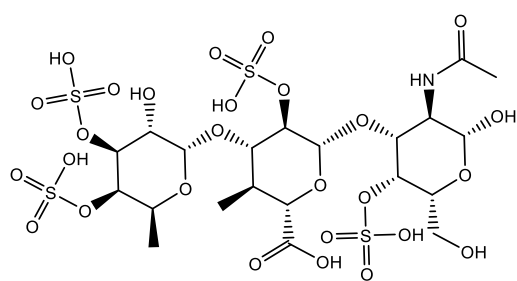

Sea cucumber sulfated polysaccharide (SCSP)

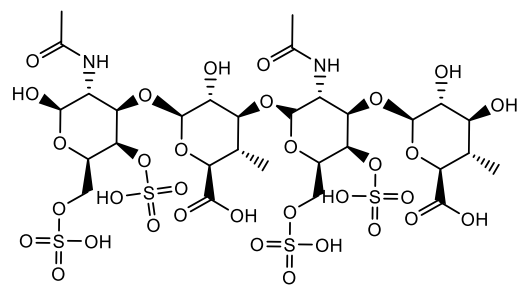

Chondroitin sulphate E (CS-E)
